# Supplementary material
Source: PubMed Central journal article supplement (PMC6583438)
Supplement: jamapediatr-173-86-s001.pdf [file jamapediatr-173-86-s001.pdf]

## Supplementary Online Content

Pagalan L, Bickford C, Weikum W, et al. Association of prenatal exposure to air pollution with autism spectrum disorder. *JAMA Pediatr*. Published online November 19, 2018. doi:10.1001/jamapediatrics.2018.3101.

**eFigure 1.** Truncated land use regression model for PM<sub>2.5</sub> (2003) in Metro Vancouver, Canada.

**eFigure 2.** Truncated land use regression model for NO (2003) in Metro Vancouver, Canada.

**eFigure 3.** Truncated land use regression model for NO<sub>2</sub> (2003) in Metro Vancouver, Canada.

**eFigure 4.** Monthly average concentrations of PM<sub>2.5</sub>, NO, and NO<sub>2</sub> from Air Quality Monitoring Stations in Metro Vancouver, 2003–2009.

**eFigure 5.** Correlation matrix of air pollutant exposures across pregnancy and trimesters.

**eFigure 6.** Overall and sex-stratified odds of ASD for prenatal exposure to air pollutants during pregnancy and trimesters among children born in Metro Vancouver, Canada, between 2004–2009.

**eTable 1.** Median monthly average prenatal exposure estimates among children born in Metro Vancouver, Canada, between 2004–2009.

**eTable 2.** Sensitivity analyses of odds of ASD for prenatal exposure to air pollutants.

**eTable 3.** Comparison of adjusted odds ratios between individual trimester models versus a mutually adjusted trimester model.

**eReferences.**

This supplementary material has been provided by the authors to give readers additional information about their work.

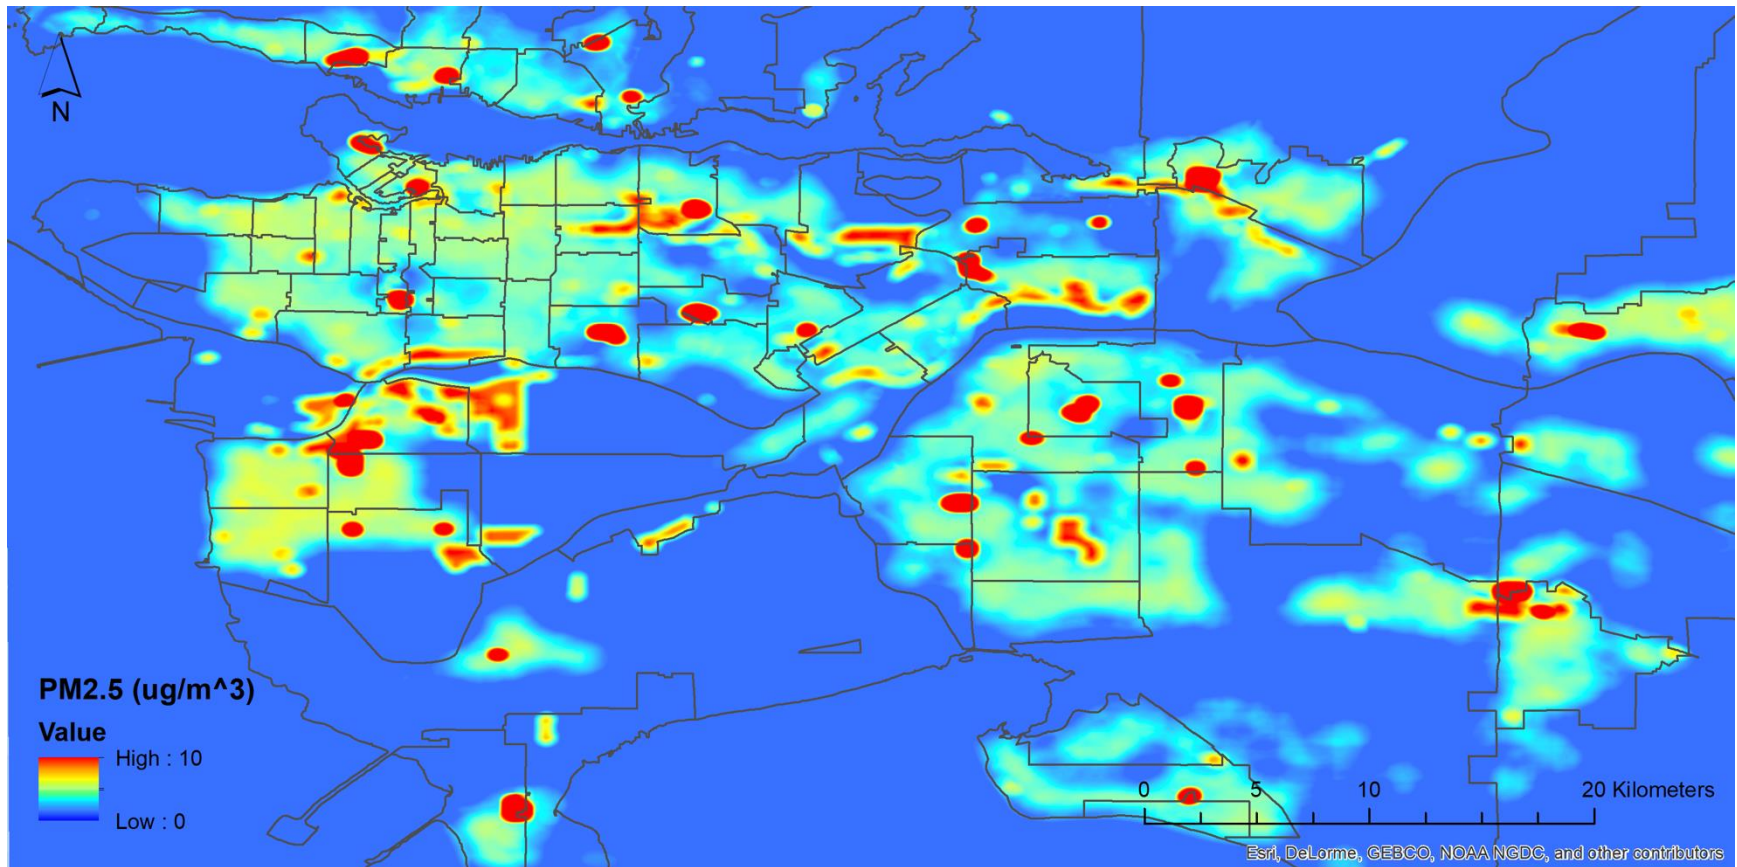

**Figure 1. Truncated land use regression model for PM<sub>2.5</sub> (2003) in Metro Vancouver, Canada.**

The original LUR models for Metro Vancouver were developed by Henderson et al. <sup>1</sup> as exposure assessment tools for epidemiological applications. We extracted air pollutant concentrations from the truncated LUR models at all postal codes <sup>2-3</sup> within the study area and then multiplied them by the temporal factors to produce monthly air pollutant estimates across all postal codes. We then linked air pollutant estimates for each mother during each month of pregnancy using conception date, birth date, and residential postal code. Mothers in the cohort resided at 52,754 unique postal codes; out of these, we truncated 8.1% to 1.4  $\mu\text{g}/\text{m}^3$  for PM<sub>2.5</sub>, 23 postal codes to 1.3 ppb for NO, and 138 postal codes to 6.9 ppb for NO<sub>2</sub>.

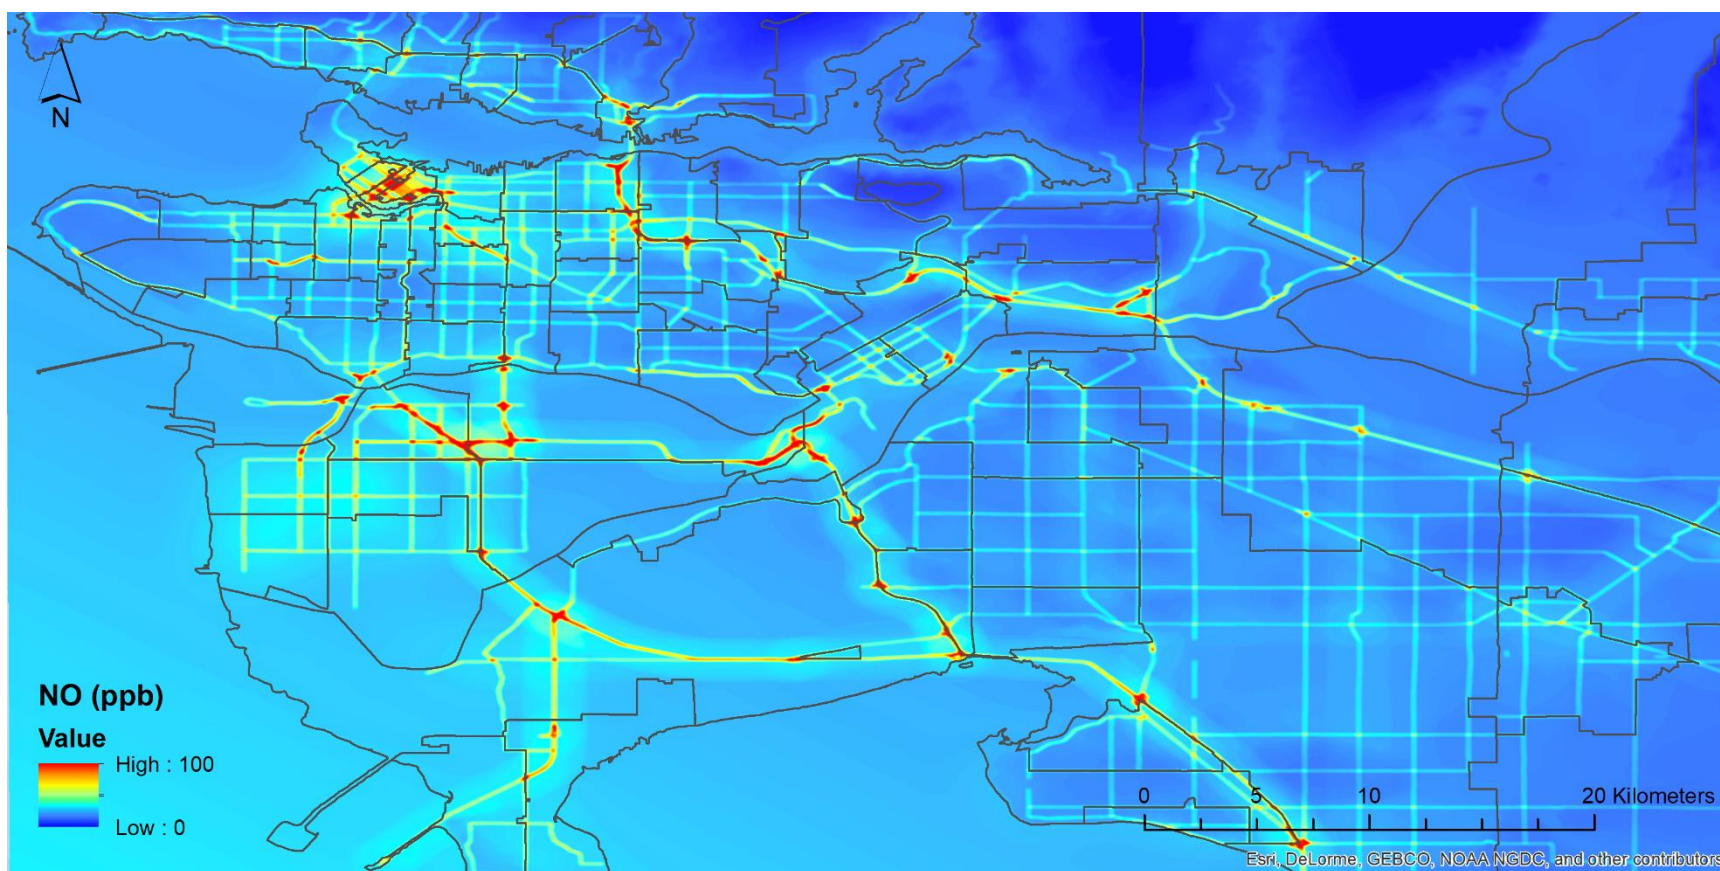

**eFigure 2. Truncated land use regression model for NO (2003) in Metro Vancouver, Canada.**

The original LUR models for Metro Vancouver were developed by Henderson et al.<sup>1</sup> as exposure assessment tools for epidemiological applications. We extracted air pollutant concentrations from the truncated LUR models at all postal codes<sup>2-3</sup> within the study area and then multiplied them by the temporal factors to produce monthly air pollutant estimates across all postal codes. We then linked air pollutant estimates for each mother during each month of pregnancy using conception date, birth date, and residential postal code. Mothers in the cohort resided at 52,754 unique postal codes; out of these, we truncated 8.1% to 1.4  $\mu\text{g}/\text{m}^3$  for  $\text{PM}_{2.5}$ , 23 postal codes to 1.3 ppb for NO, and 138 postal codes to 6.9 ppb for  $\text{NO}_2$ .



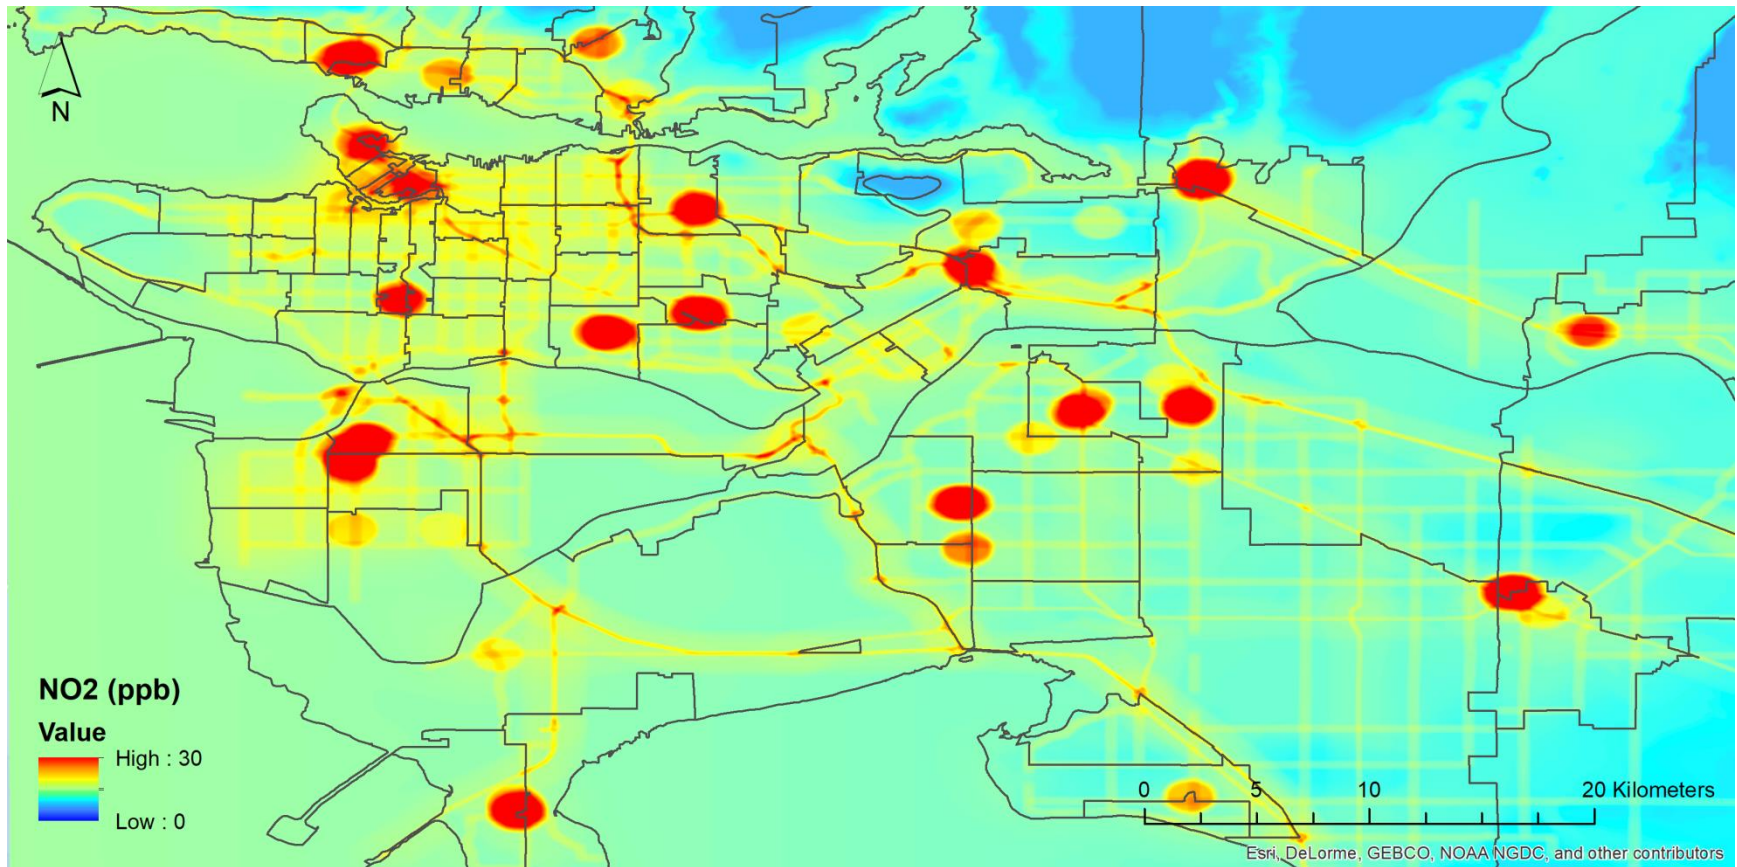

**eFigure 3. Truncated land use regression model for NO<sub>2</sub> (2003) in Metro Vancouver, Canada.**

The original LUR models for Metro Vancouver were developed by Henderson et al.<sup>1</sup> as exposure assessment tools for epidemiological applications. We extracted air pollutant concentrations from the truncated LUR models at all postal codes<sup>2-3</sup> within the study area and then multiplied them by the temporal factors to produce monthly air pollutant estimates across all postal codes. We then linked air pollutant estimates for each mother during each month of pregnancy using conception date, birth date, and residential postal code. Mothers in the cohort resided at 52,754 unique postal codes; out of these, we truncated 8.1% to 1.4 µg/m<sup>3</sup> for PM<sub>2.5</sub>, 23 postal codes to 1.3 ppb for NO, and 138 postal codes to 6.9 ppb for NO<sub>2</sub>.

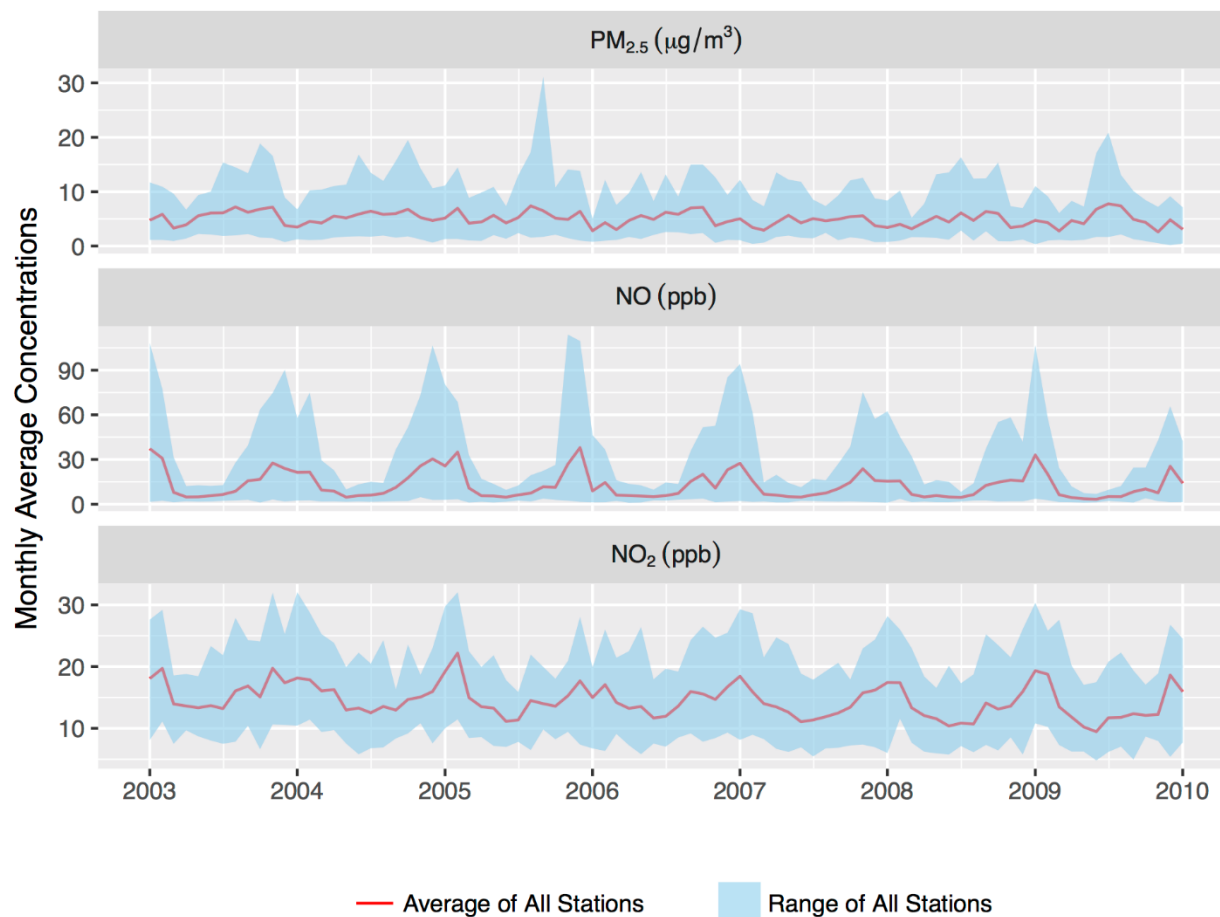

**eFigure 4. Monthly average concentrations of PM<sub>2.5</sub>, NO, and NO<sub>2</sub> from air quality monitoring stations in Metro Vancouver, 2003–2009.**

Temporal trends in monthly average concentrations PM<sub>2.5</sub>, NO, and NO<sub>2</sub> from air quality monitoring stations in Metro Vancouver. Annual average concentrations have decreased slightly: from an annual average of 5.7 to 5.0 µg/m<sup>3</sup> for PM<sub>2.5</sub>, 16.0 to 11.0 ppb for NO, and 16.0 to 13.5 ppb for NO<sub>2</sub>. Concentrations of PM<sub>2.5</sub> tended to be higher in summer, whereas NO and NO<sub>2</sub> concentrations were higher in winter.

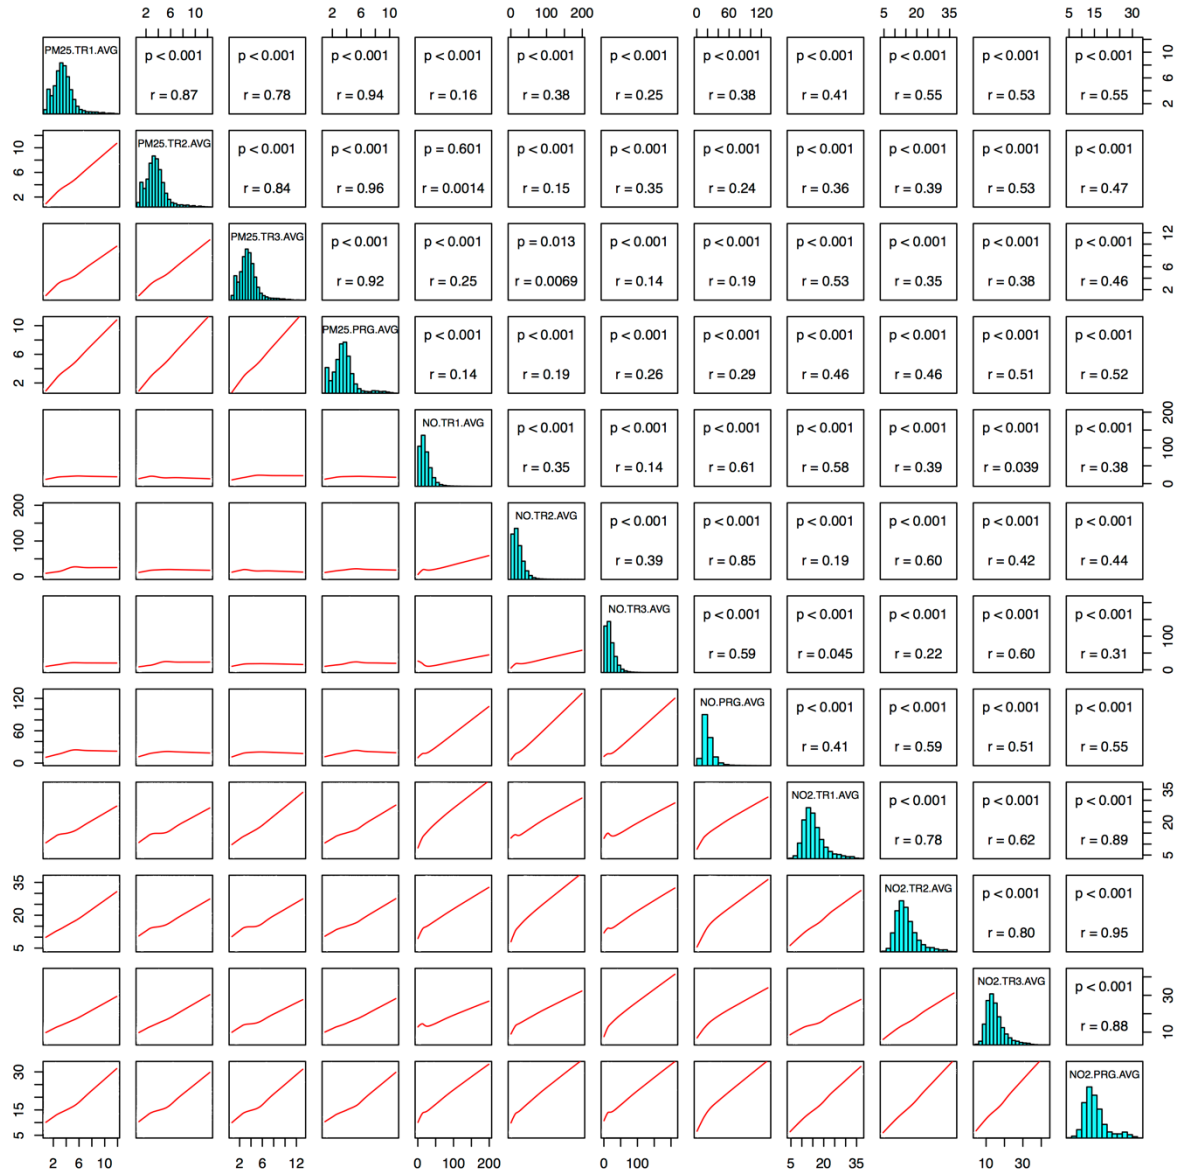

**eFigure 5. Correlation matrix of air pollutant exposures across pregnancy and trimesters.**

The correlation matrix shows the distribution of exposure estimates for each pollutant across four time periods (i.e. full pregnancy and trimesters 1–3) and the correlation coefficient among all pollutant and time periods pairs. NO<sub>2</sub> showed moderate positive correlations with both PM<sub>2.5</sub> and NO. Correlations across time periods within pollutants was high for PM<sub>2.5</sub> and NO<sub>2</sub>. Abbreviations: PRG, full pregnancy; TR1, trimester 1; TR2, trimester 2; and TR3, trimester 3.

**eFigure 6. Overall and sex-stratified odds of ASD for prenatal exposure to air pollutants during pregnancy and trimesters among children born in Metro Vancouver, Canada, between 2004–2009.**

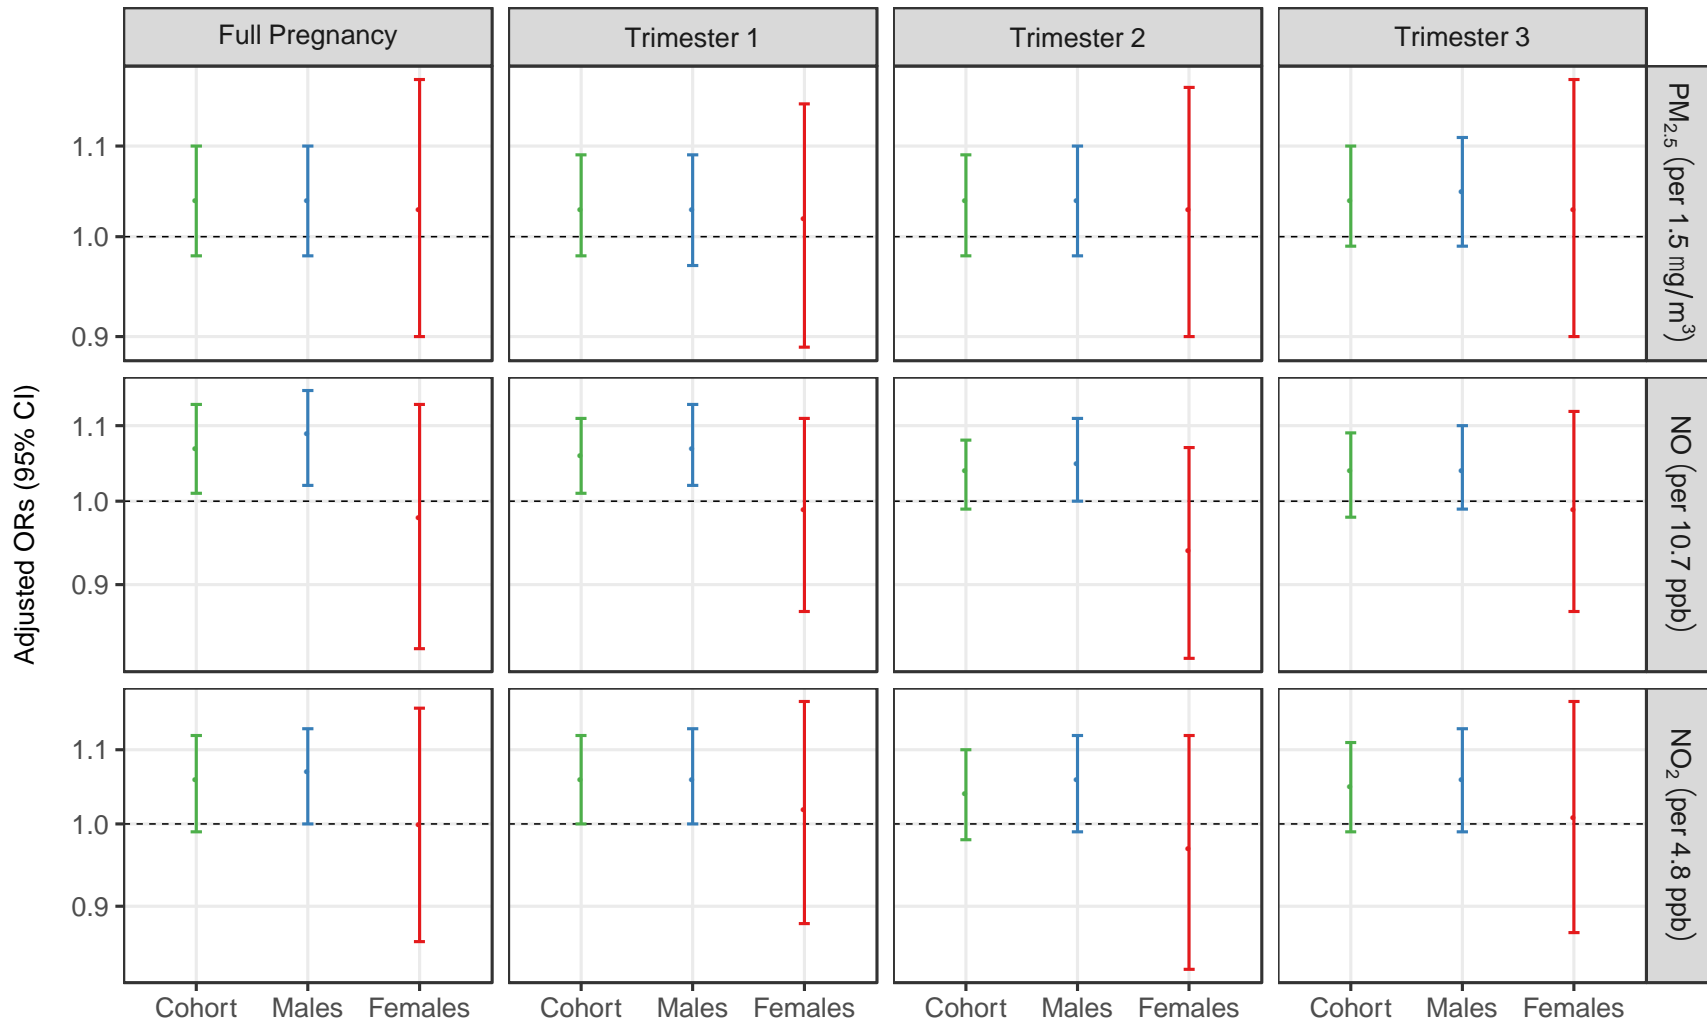

Single pollutant and single time period models adjusted for child sex, birth month, birth year, maternal age, maternal birthplace, and neighborhood-level urbanicity and income band.

**eTable 1. Median monthly average prenatal exposure estimates among children born in Metro Vancouver, Canada, between 2004–2009.**

| Pollutant         | Units             | Time Period    | Sample Size <sup>a</sup> | Median Monthly Average Exposure Estimates (IQR) |              |
|-------------------|-------------------|----------------|--------------------------|-------------------------------------------------|--------------|
| PM <sub>2.5</sub> | µg/m <sup>3</sup> | Full Pregnancy | 131,440                  | 3.5                                             | (2.7, 4.2)   |
|                   |                   | Trimester 1    | 131,447                  | 3.4                                             | (2.6, 4.3)   |
|                   |                   | Trimester 2    | 131,640                  | 3.4                                             | (2.6, 4.3)   |
|                   |                   | Trimester 3    | 131,206                  | 3.4                                             | (2.5, 4.3)   |
| NO                | ppb               | Full Pregnancy | 131,437                  | 18.3                                            | (14.0, 24.7) |
|                   |                   | Trimester 1    | 131,444                  | 17.4                                            | (10.0, 28.3) |
|                   |                   | Trimester 2    | 131,637                  | 16.6                                            | (9.5, 27.8)  |
|                   |                   | Trimester 3    | 131,203                  | 15.3                                            | (9.1, 26.5)  |
| NO <sub>2</sub>   | ppb               | Full Pregnancy | 131,437                  | 14.3                                            | (12.2, 17.0) |
|                   |                   | Trimester 1    | 131,444                  | 14.5                                            | (12.1, 17.6) |
|                   |                   | Trimester 2    | 131,637                  | 14.3                                            | (11.9, 17.5) |
|                   |                   | Trimester 3    | 131,203                  | 14.0                                            | (11.6, 17.2) |

<sup>a</sup> Monthly average exposure estimates based on complete monthly exposures for the period of interest. Incomplete prenatal monthly exposures, approximately 0.5–0.8% of the cohort ( $n = 132,256$  children), are a result of postal codes retiring during the period of interest, preventing spatial referencing.



**eTable 2. Sensitivity analyses of odds of ASD for prenatal exposure to air pollutants.**

| Pollutant         | Units                            | Model <sup>a</sup>                                                         | Sample Size | Children with ASD | OR (95% CI)       |
|-------------------|----------------------------------|----------------------------------------------------------------------------|-------------|-------------------|-------------------|
| PM <sub>2.5</sub> | Per IQR (1.5 µg/m <sup>3</sup> ) | Unadjusted full pregnancy model                                            | 131,440     | 1,300             | 1.08 (1.03, 1.14) |
|                   |                                  | Adjusted full pregnancy model                                              | 129,439     | 1,276             | 1.04 (0.98, 1.10) |
|                   |                                  | Adjusted full pregnancy model + gestational age                            | 129,439     | 1,276             | 1.04 (0.99, 1.10) |
|                   |                                  | Adjusted full pregnancy model + small for gestational age                  | 129,423     | 1,276             | 1.04 (0.98, 1.10) |
|                   |                                  | Adjusted full pregnancy model + birth weight                               | 129,423     | 1,276             | 1.04 (0.98, 1.10) |
|                   |                                  | Adjusted full pregnancy model + multiple birth                             | 129,439     | 1,276             | 1.04 (0.98, 1.10) |
|                   |                                  | Adjusted full pregnancy model + parity                                     | 129,438     | 1,276             | 1.03 (0.97, 1.08) |
|                   |                                  | Adjusted full pregnancy model + smoking                                    | 129,439     | 1,276             | 1.04 (0.98, 1.10) |
|                   |                                  | Adjusted full pregnancy model replacing birth month with conception month  | 129,439     | 1,276             | 1.04 (0.98, 1.10) |
|                   |                                  | Adjusted full pregnancy model using non-truncated, temporally adjusted LUR | 129,439     | 1,276             | 1.04 (0.98, 1.09) |
| NO                | Per IQR (10.7 ppb)               | Unadjusted full pregnancy model                                            | 131,437     | 1,300             | 1.09 (1.03, 1.14) |
|                   |                                  | Adjusted full pregnancy model                                              | 129,436     | 1,276             | 1.07 (1.01, 1.13) |
|                   |                                  | Adjusted full pregnancy model + gestational age                            | 129,436     | 1,276             | 1.07 (1.01, 1.13) |
|                   |                                  | Adjusted full pregnancy model + small for gestational age                  | 129,420     | 1,276             | 1.07 (1.01, 1.13) |
|                   |                                  | Adjusted full pregnancy model + birth weight                               | 129,420     | 1,276             | 1.07 (1.01, 1.13) |
|                   |                                  | Adjusted full pregnancy model + multiple birth                             | 129,436     | 1,276             | 1.07 (1.01, 1.13) |
|                   |                                  | Adjusted full pregnancy model + parity                                     | 129,435     | 1,276             | 1.05 (0.99, 1.11) |
|                   |                                  | Adjusted full pregnancy model + smoking                                    | 129,436     | 1,276             | 1.07 (1.01, 1.13) |
|                   |                                  | Adjusted full pregnancy model replacing birth month with conception month  | 129,436     | 1,276             | 1.07 (1.01, 1.13) |
|                   |                                  | Adjusted full pregnancy model using non-truncated, temporally adjusted LUR | 129,436     | 1,276             | 1.07 (1.01, 1.13) |
| NO <sub>2</sub>   | Per IQR (4.8 ppb)                | Unadjusted full pregnancy model                                            | 131,437     | 1,300             | 1.11 (1.05, 1.17) |
|                   |                                  | Adjusted full pregnancy model                                              | 129,436     | 1,276             | 1.06 (0.99, 1.12) |
|                   |                                  | Adjusted full pregnancy model + gestational age                            | 129,436     | 1,276             | 1.06 (1.00, 1.12) |
|                   |                                  | Adjusted full pregnancy model + small for gestational age                  | 129,420     | 1,276             | 1.05 (0.99, 1.12) |
|                   |                                  | Adjusted full pregnancy model + birth weight                               | 129,420     | 1,276             | 1.06 (0.99, 1.12) |
|                   |                                  | Adjusted full pregnancy model + multiple birth                             | 129,436     | 1,276             | 1.06 (0.99, 1.12) |
|                   |                                  | Adjusted full pregnancy model + parity                                     | 129,435     | 1,276             | 1.03 (0.97, 1.09) |
|                   |                                  | Adjusted full pregnancy model + smoking                                    | 129,436     | 1,276             | 1.05 (0.99, 1.12) |
|                   |                                  | Adjusted full pregnancy model replacing birth month with conception month  | 129,436     | 1,276             | 1.06 (0.99, 1.12) |
|                   |                                  | Adjusted full pregnancy model using non-truncated, temporally adjusted LUR | 129,436     | 1,276             | 1.06 (0.99, 1.12) |

<sup>a</sup> Models adjusted for child sex, birth month, birth year, maternal age, maternal birthplace, and neighborhood-level urbanicity and income band.

**eTable 3. Comparison of adjusted odds ratios between individual trimester models versus a mutually adjusted trimester model.**

| Pollutant                                           | Units                               | Model <sup>a</sup>                                  | Trimester             | OR (95 %)                  |
|-----------------------------------------------------|-------------------------------------|-----------------------------------------------------|-----------------------|----------------------------|
| PM <sub>2.5</sub>                                   | Per IQR<br>(1.5 µg/m <sup>3</sup> ) | Adjusted trimester 1 model                          | Trimester 1           | 1.03 (0.98, 1.09)          |
|                                                     |                                     | Adjusted trimester 2 model                          | Trimester 2           | 1.04 (0.98, 1.09)          |
|                                                     |                                     | Adjusted trimester 3 model                          | Trimester 3           | 1.04 (0.99, 1.10)          |
|                                                     |                                     | Adjusted model with mutually<br>adjusted trimesters | Trimester 1           | 0.92 (0.79, 1.08)          |
|                                                     |                                     |                                                     | Trimester 2           | 1.06 (0.90, 1.24)          |
|                                                     |                                     |                                                     | Trimester 3           | 1.06 (0.93, 1.22)          |
|                                                     |                                     | NO                                                  | Per IQR<br>(10.7 ppb) | Adjusted trimester 1 model |
| Adjusted trimester 2 model                          | Trimester 2                         |                                                     |                       | 1.04 (0.99, 1.08)          |
| Adjusted trimester 3 model                          | Trimester 3                         |                                                     |                       | 1.04 (0.98, 1.09)          |
| Adjusted model with mutually<br>adjusted trimesters | Trimester 1                         |                                                     |                       | 1.06 (1.00, 1.13)          |
|                                                     | Trimester 2                         |                                                     |                       | 0.98 (0.91, 1.05)          |
|                                                     | Trimester 3                         |                                                     |                       | 1.02 (0.96, 1.09)          |
| NO <sub>2</sub>                                     | Per IQR<br>(4.8 ppb)                | Adjusted trimester 1 model                          | Trimester 1           | 1.06 (1.00, 1.12)          |
|                                                     |                                     | Adjusted trimester 2 model                          | Trimester 2           | 1.04 (0.98, 1.10)          |
|                                                     |                                     | Adjusted trimester 3 model                          | Trimester 3           | 1.05 (0.99, 1.11)          |
|                                                     |                                     | Adjusted model with mutually<br>adjusted trimesters | Trimester 1           | 1.09 (0.93, 1.28)          |
|                                                     |                                     |                                                     | Trimester 2           | 0.90 (0.75, 1.09)          |
|                                                     |                                     |                                                     | Trimester 3           | 1.07 (0.90, 1.26)          |

<sup>a</sup> Models adjusted for child sex, birth month, birth year, maternal age, maternal birthplace, and neighborhood-level urbanicity and income band.

## eReferences

1. Henderson SB, Beckerman B, Jerrett M, Brauer M. Application of land use regression to estimate long-term concentrations of traffic-related nitrogen oxides and fine particulate matter. *Environ Sci Technol*. 2007;41(7):2422-2428. doi:10.1021/es0606780
2. 2009-11-19, “Census of Canada. Postal Code Conversion File, January 2003 Postal Codes, 2001”, <http://hdl.handle.net.proxy.lib.sfu.ca/11272/TF2D9> V3 [Version].
3. 2009-11-19, “Census of Canada. Postal Code Conversion File, July 2004 Postal Codes, 2001”, <http://hdl.handle.net.proxy.lib.sfu.ca/11272/SRHXX> V2 [Version].
4. 2009-11-18, “Census of Canada. Postal Code Conversion File, October 2005 Postal Codes, 2001”, <http://hdl.handle.net.proxy.lib.sfu.ca/11272/92QKP> V3 [Version].
5. 2009-11-19, “Census of Canada. Postal Code Conversion File, September 2006 Postal Codes, 2001”, <http://hdl.handle.net.proxy.lib.sfu.ca/11272/HQIOQ> V2 [Version].
6. 2009-11-19, “Census of Canada. Postal Code Conversion File, September 2007 Postal Codes, 2006 [2007]”, <http://hdl.handle.net.proxy.lib.sfu.ca/11272/PVYH> V2 [Version].
7. 2009-11-18, “Census of Canada. Postal Code Conversion File, March 2008 Postal Codes, 2006 [2008]”, <http://hdl.handle.net.proxy.lib.sfu.ca/11272/LNEEC> V3 [Version].
8. 2010-01-28, “Census of Canada. Postal Code Conversion File, July 2009 Postal Codes, 2006 [2009]”, <http://hdl.handle.net.proxy.lib.sfu.ca/11272/NTC6K> V3 [Version].
